# Supplementary material for: Argyrodite configuration determination for DFT and AIMD calculations using an integrated optimization strategy
Source: Royal Society of Chemistry journal article supplement (doi:10.1039/d2ra05889h), 2022-01-01
Supplement: d2ra05889h1.pdf [file d2ra05889h1.pdf]

## Supplementary Information

### **Argyrodite Configuration Determination for DFT and AIMD Calculations Using an Integrated Optimization Strategy†**

Byung Do Lee,‡<sup>a</sup> Jin-Woong Lee,‡<sup>a</sup> Joonseo Park,<sup>a</sup> Min Young Cho,<sup>a</sup> Woon Bae Park,<sup>\*b</sup> and Kee-Sun Sohn<sup>\*a</sup>

<sup>a</sup> *Faculty of Nanotechnology & Advanced Materials Engineering, Sejong University, 209 Neungdong-ro, Gwangjin-gu, Seoul, 143-747, South Korea*

<sup>b</sup> *Department of Advanced Components and Materials Engineering, Suncheon National University, Chonnam 57922, South Korea*

‡ These authors contributed equally

\* Corresponding authors

E-mail: kssohn@sejong.ac.kr; wbpark@scnu.ac.kr

# Ackley

$$f(x) = -a \exp\left(-b \sum_{i=1}^d x_i^2\right) - \exp\left(\frac{1}{d} \sum_{i=1}^d \cos(cx_i)\right) + a + \exp(1)$$

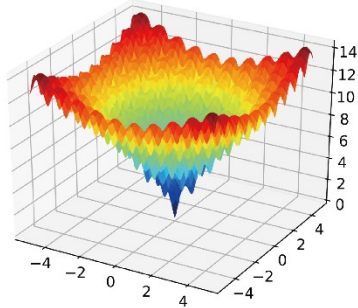

Population Size = 25  
 $-5 \leq (X_1, X_2, \dots, X_d) \leq 5$   
 $Y_{\min} = 0$  at  $(0,0,0,0,0,0)$

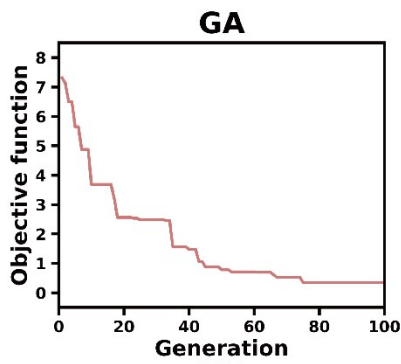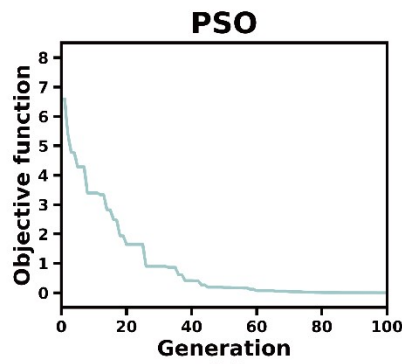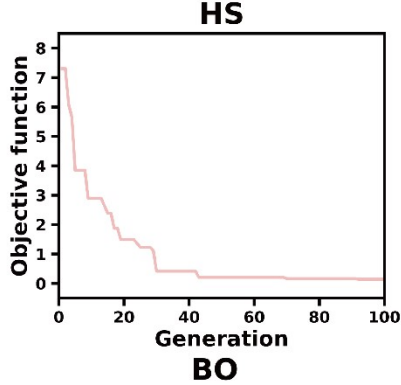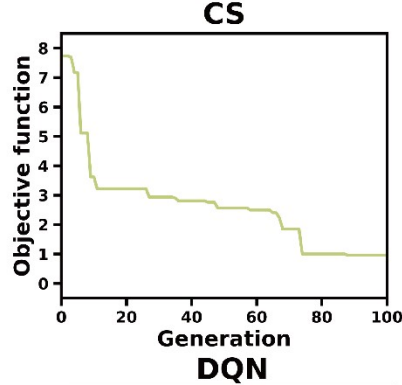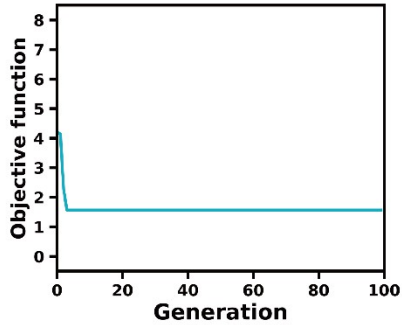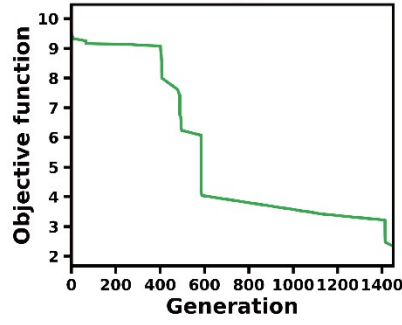

# Egg Crate

$$f(x) = \sum_{i=1}^d (x_i^2 + 25 \sin x_i^2)$$

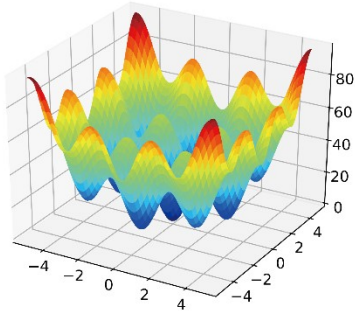

Population Size = 25  
 $-5 \leq (X_1, X_2, \dots, X_6) \leq 5$   
 $Y_{\min} = 0$  at  $(0,0,0,0,0,0)$

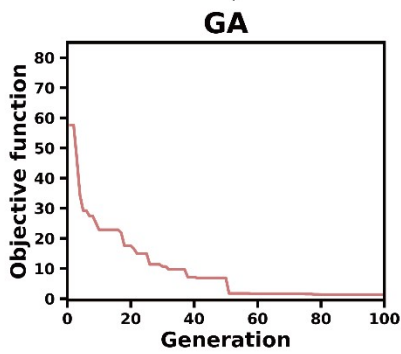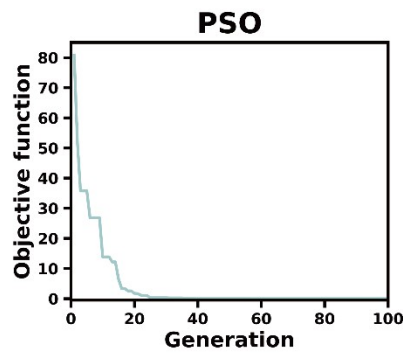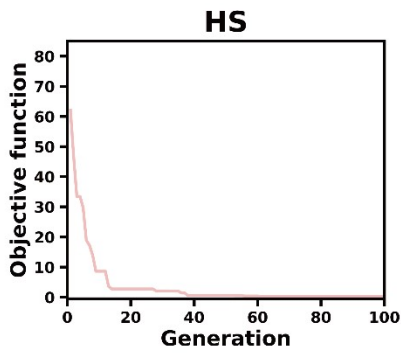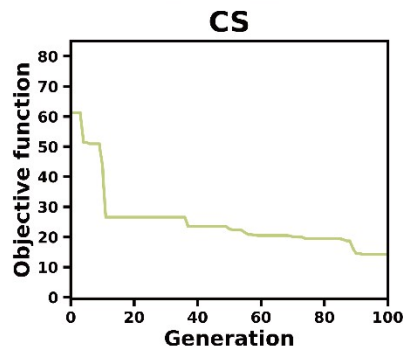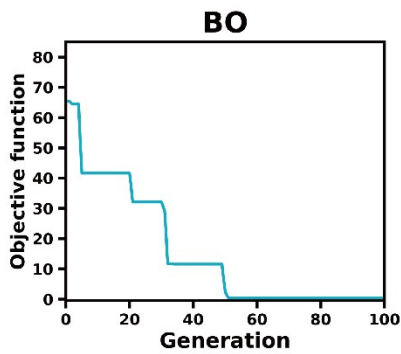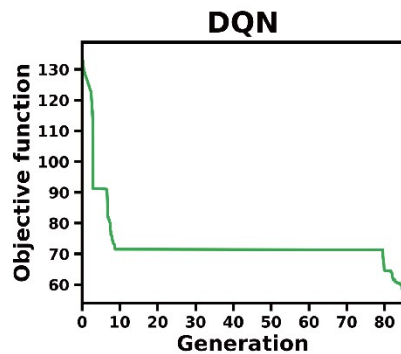

# Griewank

$$f(x) = \sum_{i=1}^d \frac{x_i^2}{4000} - \prod_{i=1}^d \left( \frac{x_i}{\sqrt{i}} \right) + 1$$

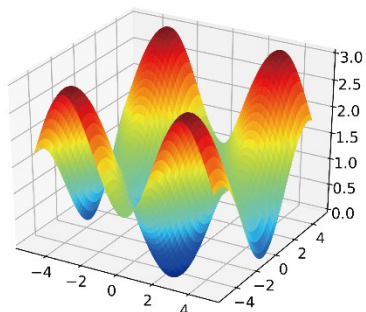

Population Size = 25  
 $-5 \leq (X_1, X_2, \dots, X_6) \leq 5$   
 $Y_{\min} = 0$  at  $(0,0,0,0,0,0)$

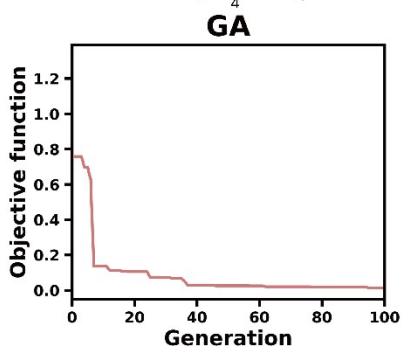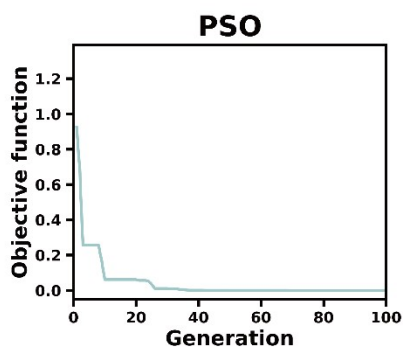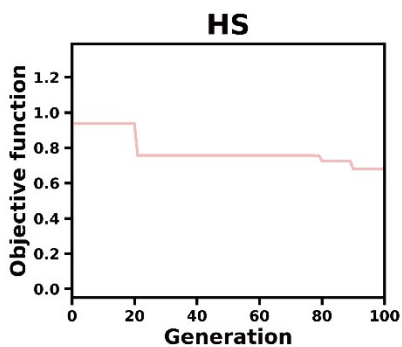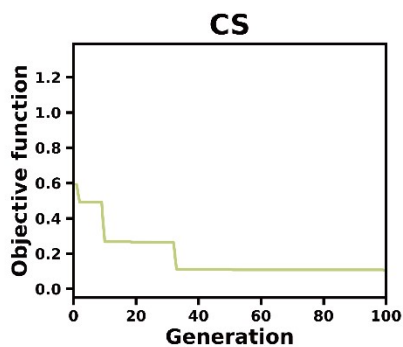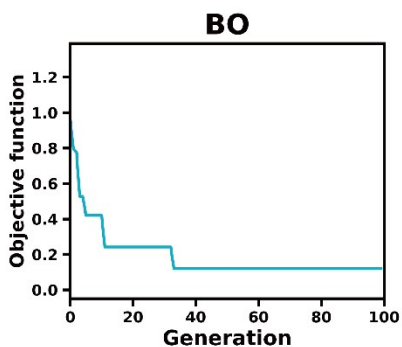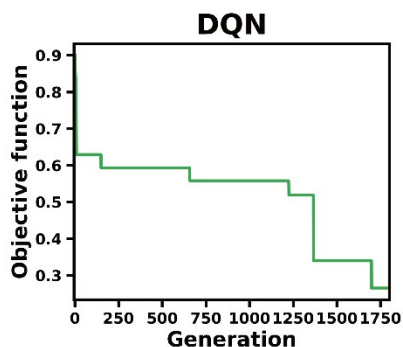

# Rastrigin

$$f(x) = 10d + \sum_{i=1}^d [x_i^2 - 10 \cos(2\pi x_i)]$$

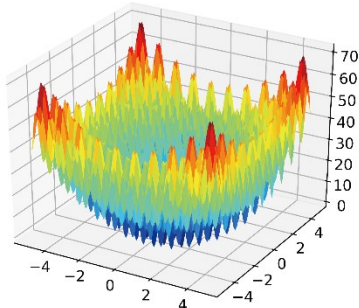

Population Size = 25  
 $-5 \leq (X_1, X_2, \dots, X_6) \leq 5$   
 $Y_{\min} = 0$  at (0,0,0,0,0,0)

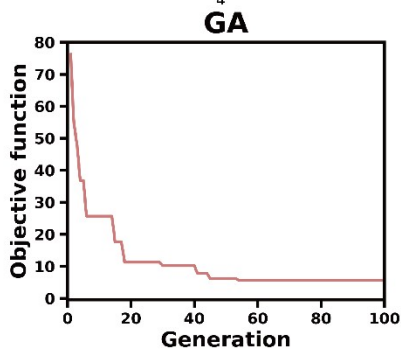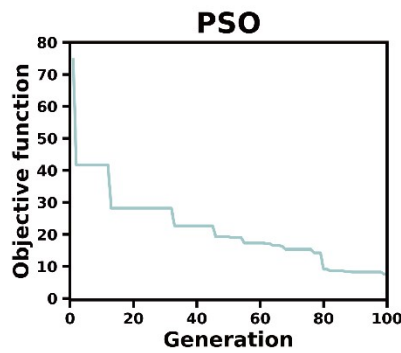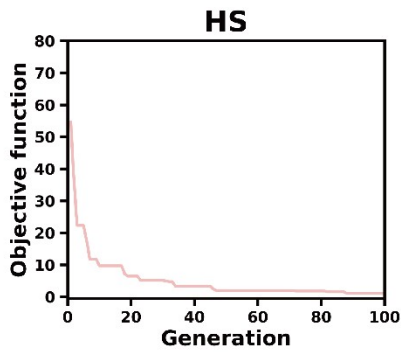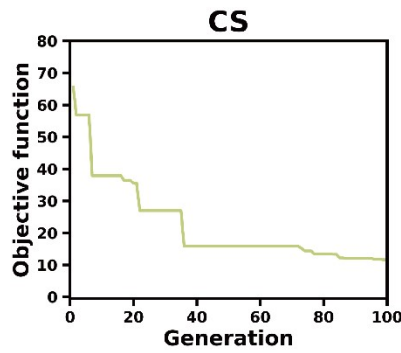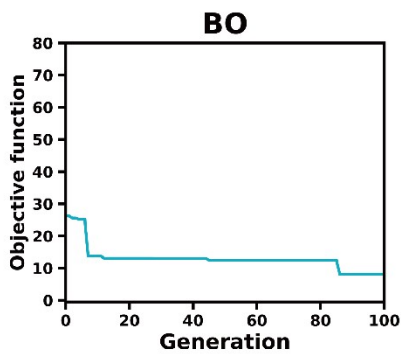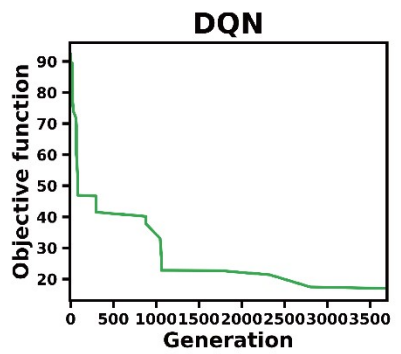

# Rosenbrock

$$f(x) = \sum_{i=1}^{d-1} [100(x_{i+1} - x_i^2)^2 + (x_i - 1)^2]$$

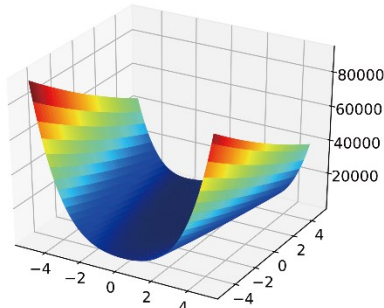

Population Size = 25  
 $-5 \leq (X_1, X_2, \dots, X_6) \leq 5$   
 $Y_{\min} = 0$  at  $(1, 1, 1, 1, 1, 1)$

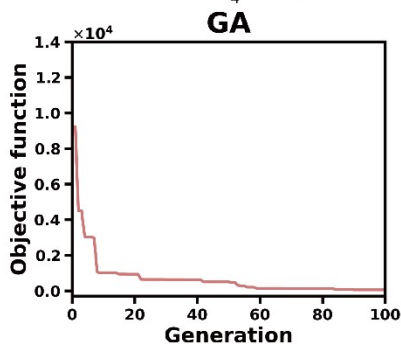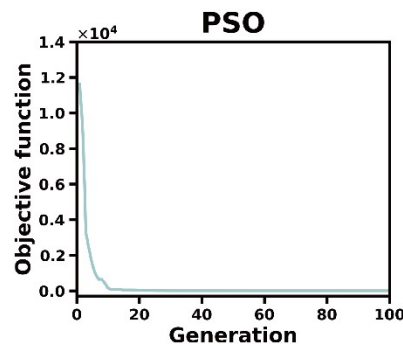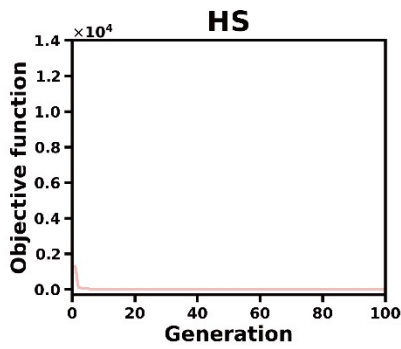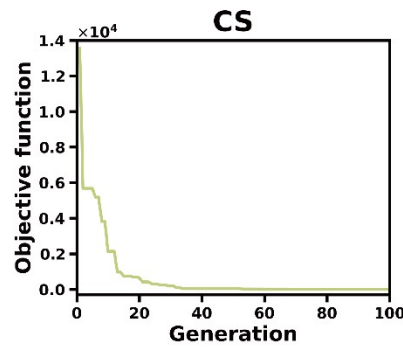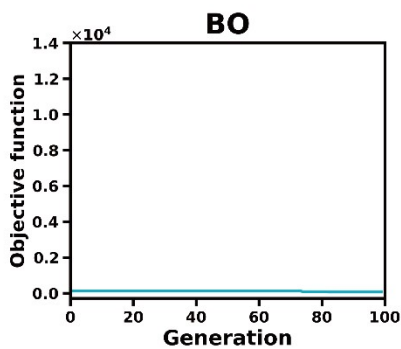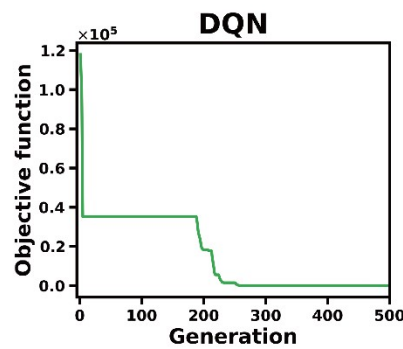

# Sphere

$$f(x) = \sum_{i=1}^d x_i^2$$

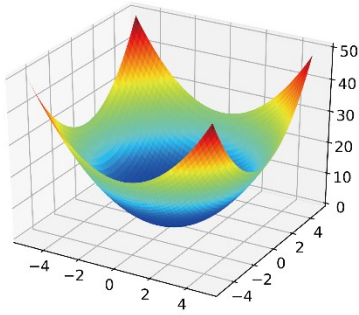

Population Size = 25  
 $-5 \leq (X_1, X_2, \dots, X_6) \leq 5$   
 $Y_{\min} = 0$  at  $(0,0,0,0,0,0)$

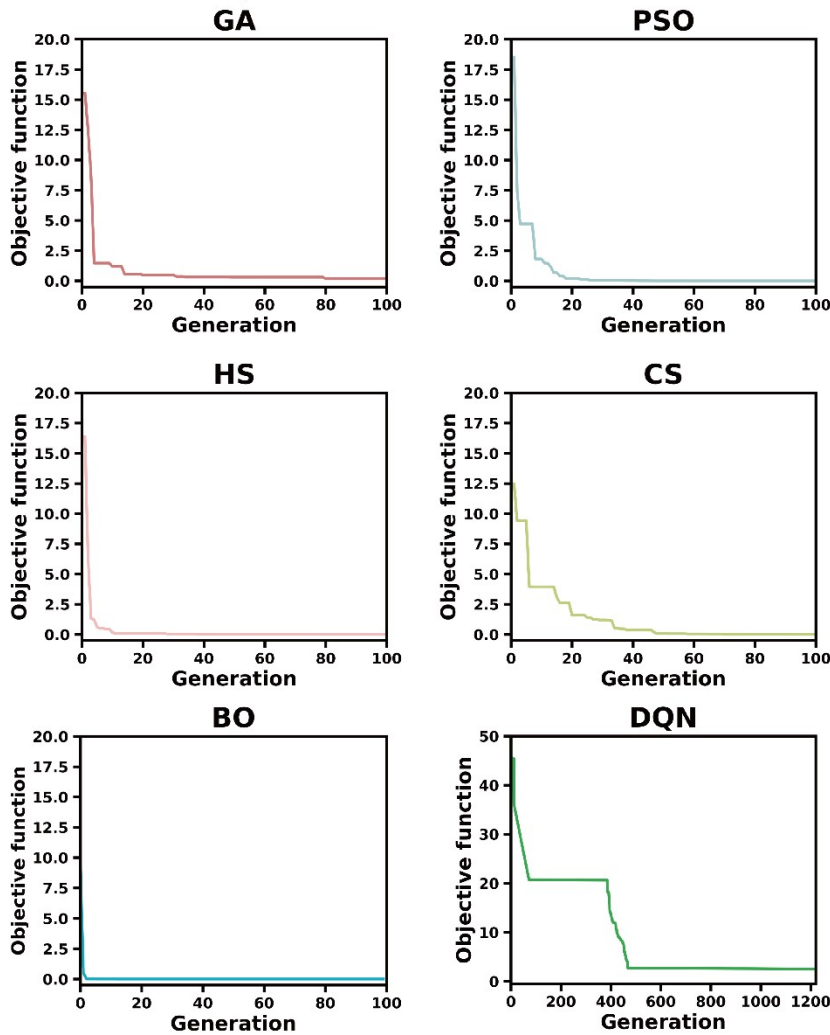

**Fig. S1** Test result for all the optimization algorithms using several well-known benchmark test functions such as Ackley, Egg Crate, Griewank, Rastrigin, Rosenbrock, and Sphere functions, each of which is schematically described in the 2D scheme. The instantaneous objective function value versus the generation number for each benchmark function.

# Genetic Algorithm

**10<sup>th</sup> Gen.**

$E_c = -248.57 \text{ eV / f. u.}$

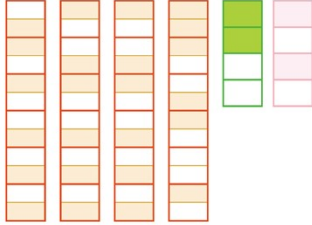

**20<sup>th</sup> Gen.**

$E_c = -248.57 \text{ eV / f. u.}$

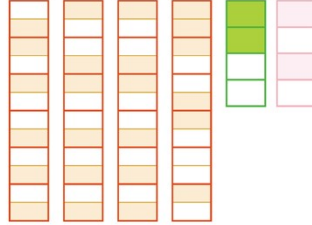

**30<sup>th</sup> Gen.**

$E_c = -248.65 \text{ eV / f. u.}$

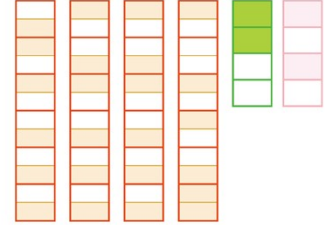

**40<sup>th</sup> Gen.**

$E_c = -248.75 \text{ eV / f. u.}$

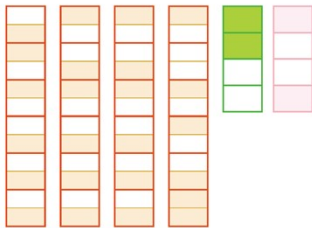

**50<sup>th</sup> Gen.**

$E_c = -248.87 \text{ eV / f. u.}$

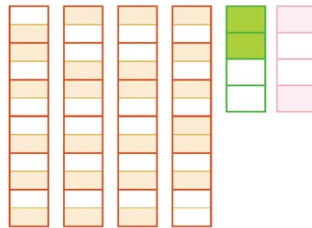

**60<sup>th</sup> Gen.**

$E_c = -249.12 \text{ eV / f. u.}$

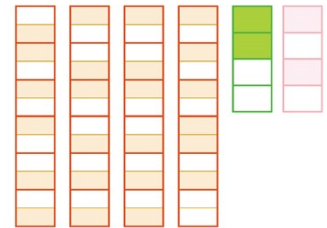

**70<sup>th</sup> Gen.**

$E_c = -249.15 \text{ eV / f. u.}$

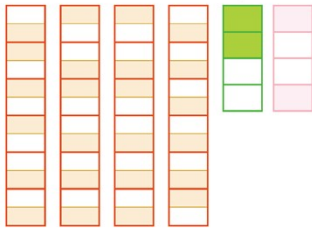

**80<sup>th</sup> Gen.**

$E_c = -249.15 \text{ eV / f. u.}$

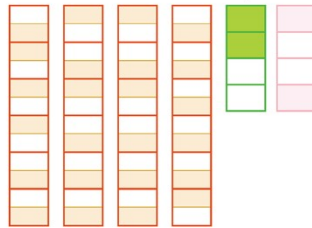

**90<sup>th</sup> Gen.**

$E_c = -249.15 \text{ eV / f. u.}$

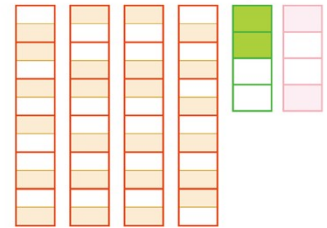

**100<sup>th</sup> Gen.**

$E_c = -249.27 \text{ eV / f. u.}$

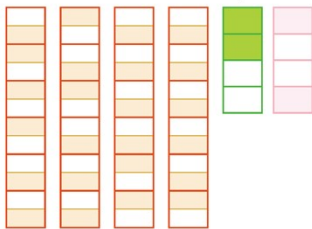



# Particle Swarm Optimization

**10<sup>th</sup> Gen.**

$E_c = -245.67 \text{ eV / f. u.}$

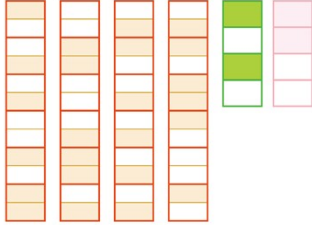

**20<sup>th</sup> Gen.**

$E_c = -246.62 \text{ eV / f. u.}$

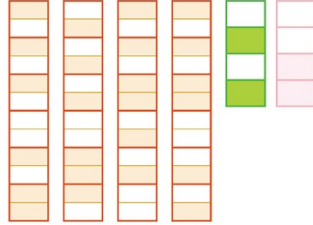

**30<sup>th</sup> Gen.**

$E_c = -246.62 \text{ eV / f. u.}$

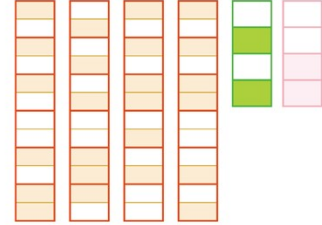

**40<sup>th</sup> Gen.**

$E_c = -247.25 \text{ eV / f. u.}$

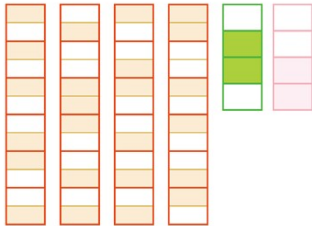

**50<sup>th</sup> Gen.**

$E_c = -247.76 \text{ eV / f. u.}$

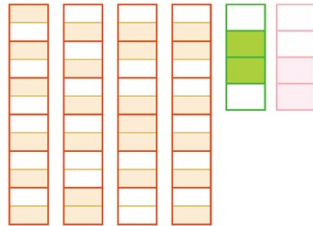

**60<sup>th</sup> Gen.**

$E_c = -247.76 \text{ eV / f. u.}$

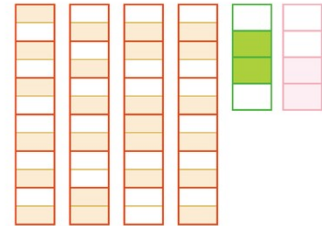

**70<sup>th</sup> Gen.**

$E_c = -247.76 \text{ eV / f. u.}$

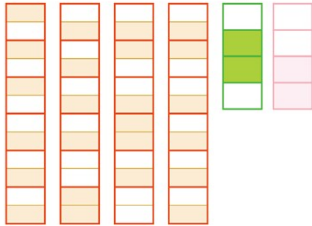

**80<sup>th</sup> Gen.**

$E_c = -248.10 \text{ eV / f. u.}$

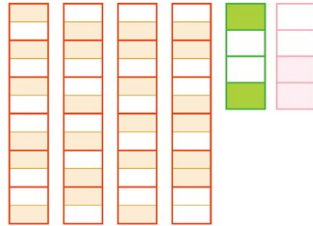

**90<sup>th</sup> Gen.**

$E_c = -248.10 \text{ eV / f. u.}$

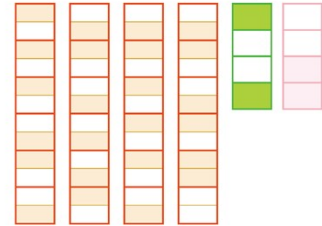

**100<sup>th</sup> Gen.**

$E_c = -248.10 \text{ eV / f. u.}$

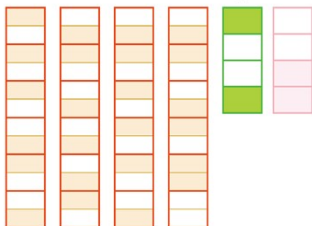

# Harmony Search

**10<sup>th</sup> Gen.**

$E_c = -247.23 \text{ eV / f. u.}$

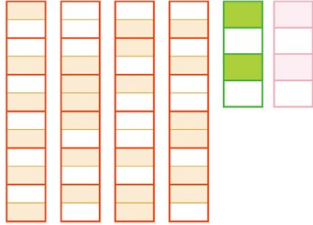

**20<sup>th</sup> Gen.**

$E_c = -247.23 \text{ eV / f. u.}$

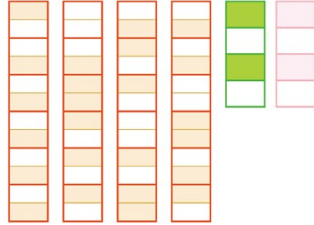

**30<sup>th</sup> Gen.**

$E_c = -248.50 \text{ eV / f. u.}$

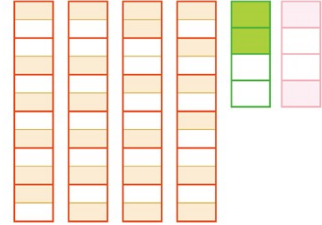

**40<sup>th</sup> Gen.**

$E_c = -248.50 \text{ eV / f. u.}$

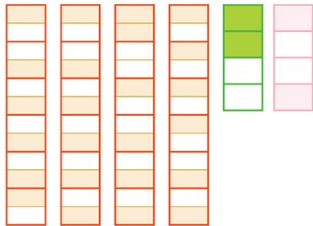

**50<sup>th</sup> Gen.**

$E_c = -248.50 \text{ eV / f. u.}$

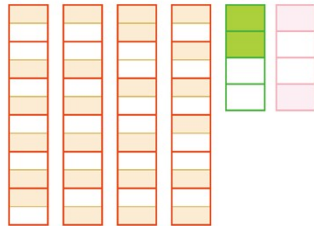

**60<sup>th</sup> Gen.**

$E_c = -248.50 \text{ eV / f. u.}$

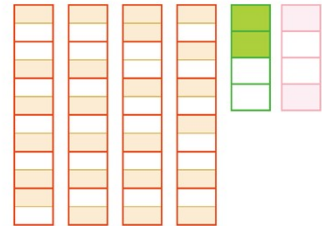

**70<sup>th</sup> Gen.**

$E_c = -248.50 \text{ eV / f. u.}$

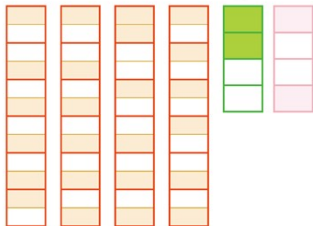

**80<sup>th</sup> Gen.**

$E_c = -248.50 \text{ eV / f. u.}$

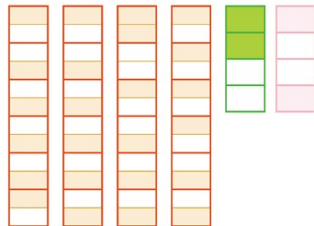

**90<sup>th</sup> Gen.**

$E_c = -248.50 \text{ eV / f. u.}$

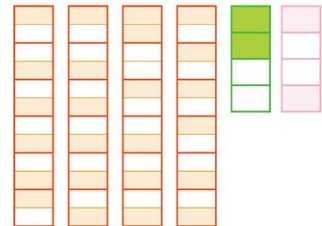

**100<sup>th</sup> Gen.**

$E_c = -248.72 \text{ eV / f. u.}$

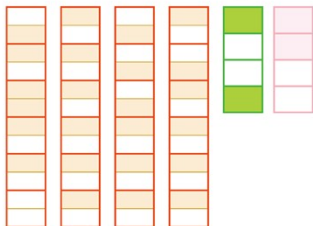

# Cuckoo Search

**10<sup>th</sup> Gen.**

$E_c = -247.05 \text{ eV / f. u.}$

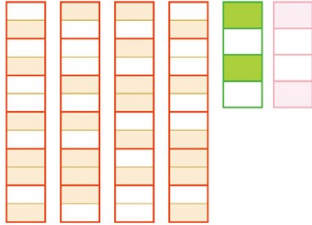

**20<sup>th</sup> Gen.**

$E_c = -248.59 \text{ eV / f. u.}$

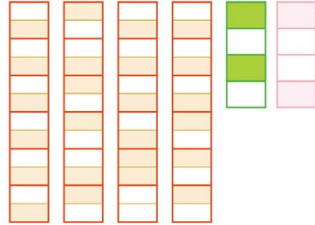

**30<sup>th</sup> Gen.**

$E_c = -247.67 \text{ eV / f. u.}$

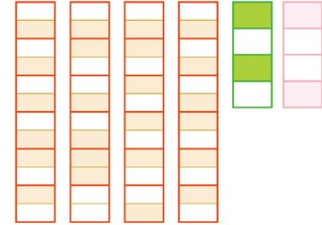

**40<sup>th</sup> Gen.**

$E_c = -247.67 \text{ eV / f. u.}$

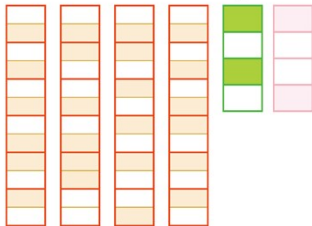

**50<sup>th</sup> Gen.**

$E_c = -247.67 \text{ eV / f. u.}$

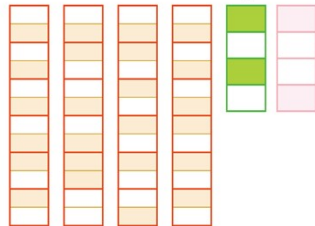

**60<sup>th</sup> Gen.**

$E_c = -248.18 \text{ eV / f. u.}$

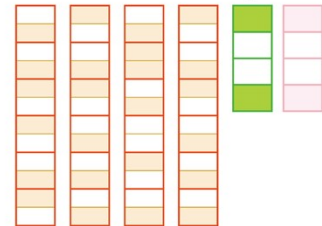

**70<sup>th</sup> Gen.**

$E_c = -248.80 \text{ eV / f. u.}$

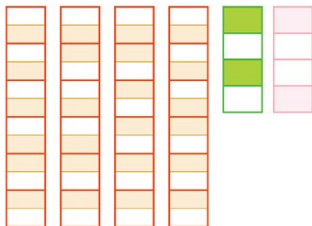

**80<sup>th</sup> Gen.**

$E_c = -248.80 \text{ eV / f. u.}$

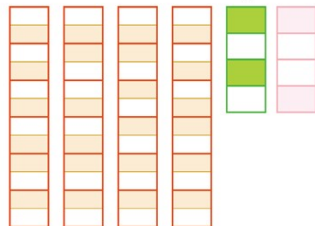

**90<sup>th</sup> Gen.**

$E_c = -248.80 \text{ eV / f. u.}$

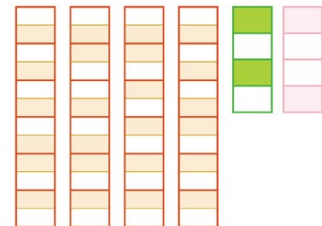

**100<sup>th</sup> Gen.**

$E_c = -248.80 \text{ eV / f. u.}$

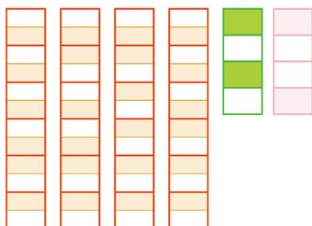

# Bayesian Optimization

**10<sup>th</sup> Gen.**

$E_c = -246.63 \text{ eV / f. u.}$

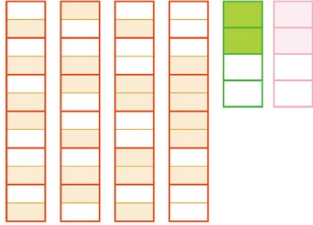

**20<sup>th</sup> Gen.**

$E_c = -246.63 \text{ eV / f. u.}$

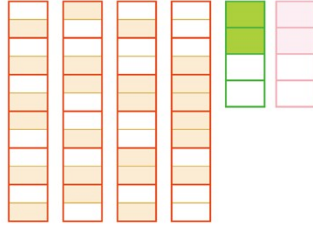

**30<sup>th</sup> Gen.**

$E_c = -246.88 \text{ eV / f. u.}$

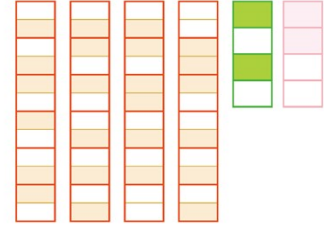

**40<sup>th</sup> Gen.**

$E_c = -246.88 \text{ eV / f. u.}$

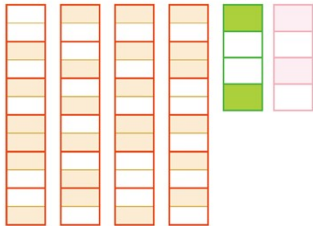

**50<sup>th</sup> Gen.**

$E_c = -246.88 \text{ eV / f. u.}$

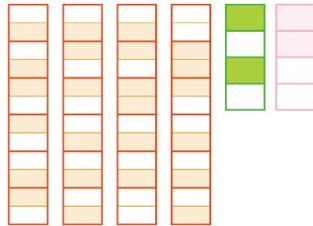

**60<sup>th</sup> Gen.**

$E_c = -246.88 \text{ eV / f. u.}$

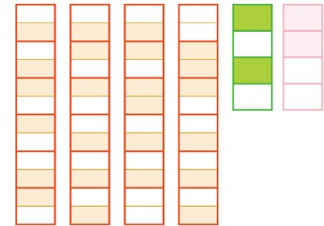

**70<sup>th</sup> Gen.**

$E_c = -246.88 \text{ eV / f. u.}$

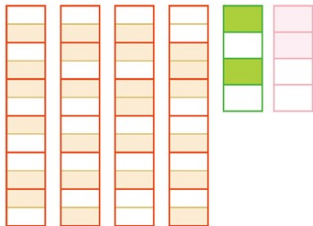

**80<sup>th</sup> Gen.**

$E_c = -247.54 \text{ eV / f. u.}$

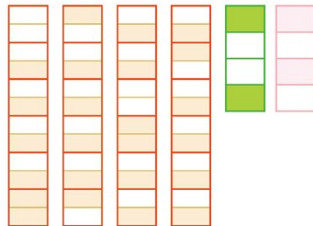

**90<sup>th</sup> Gen.**

$E_c = -247.54 \text{ eV / f. u.}$

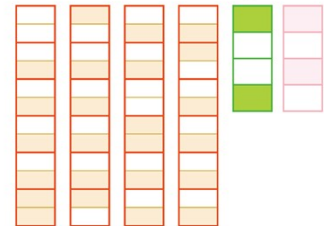

**100<sup>th</sup> Gen.**

$E_c = -247.54 \text{ eV / f. u.}$

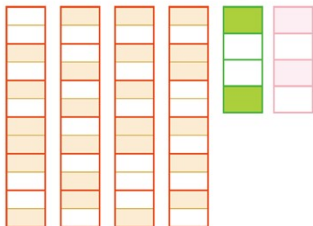

# Deep Q-Learning

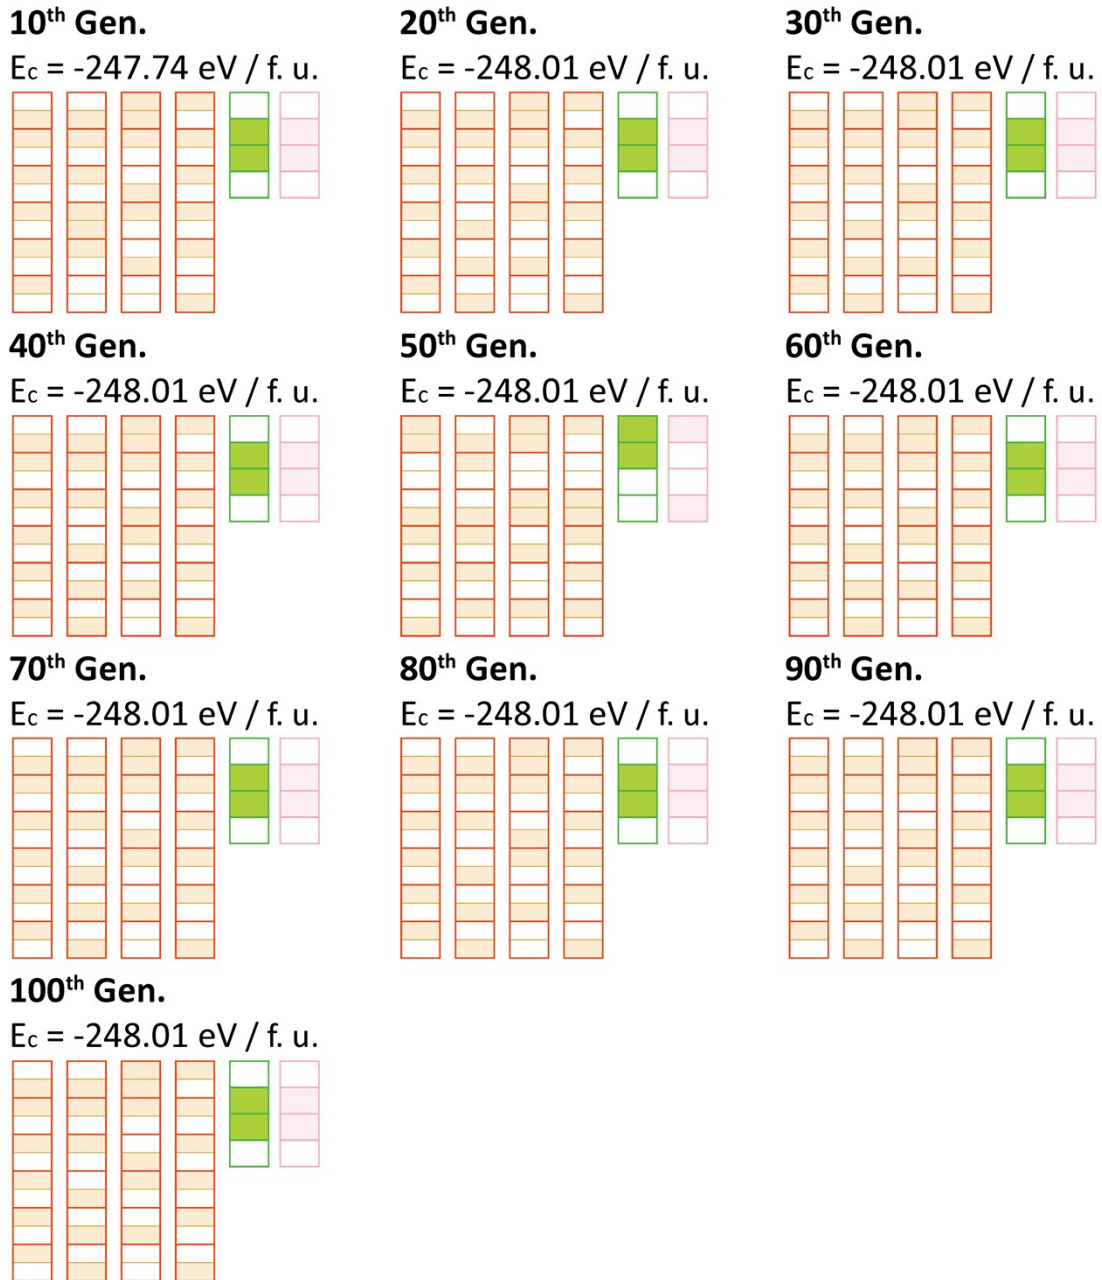

**Fig. S2** The configurations selected every 10<sup>th</sup> generation for GA, PSO, HS, CS, BO, and DQN algorithms.

# Ackley

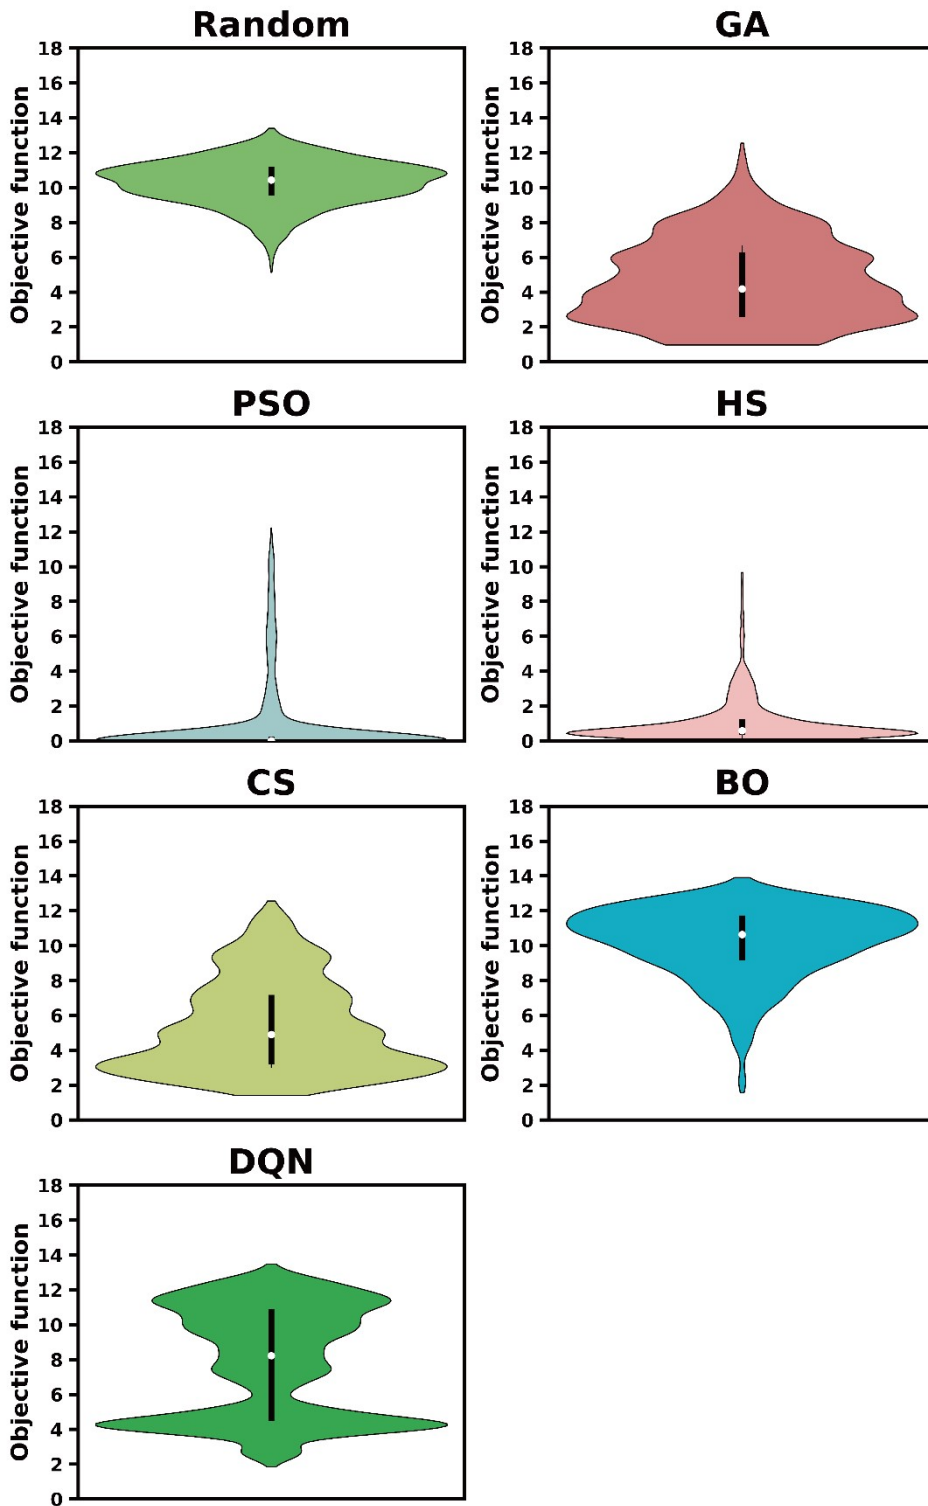

# Eggcrate

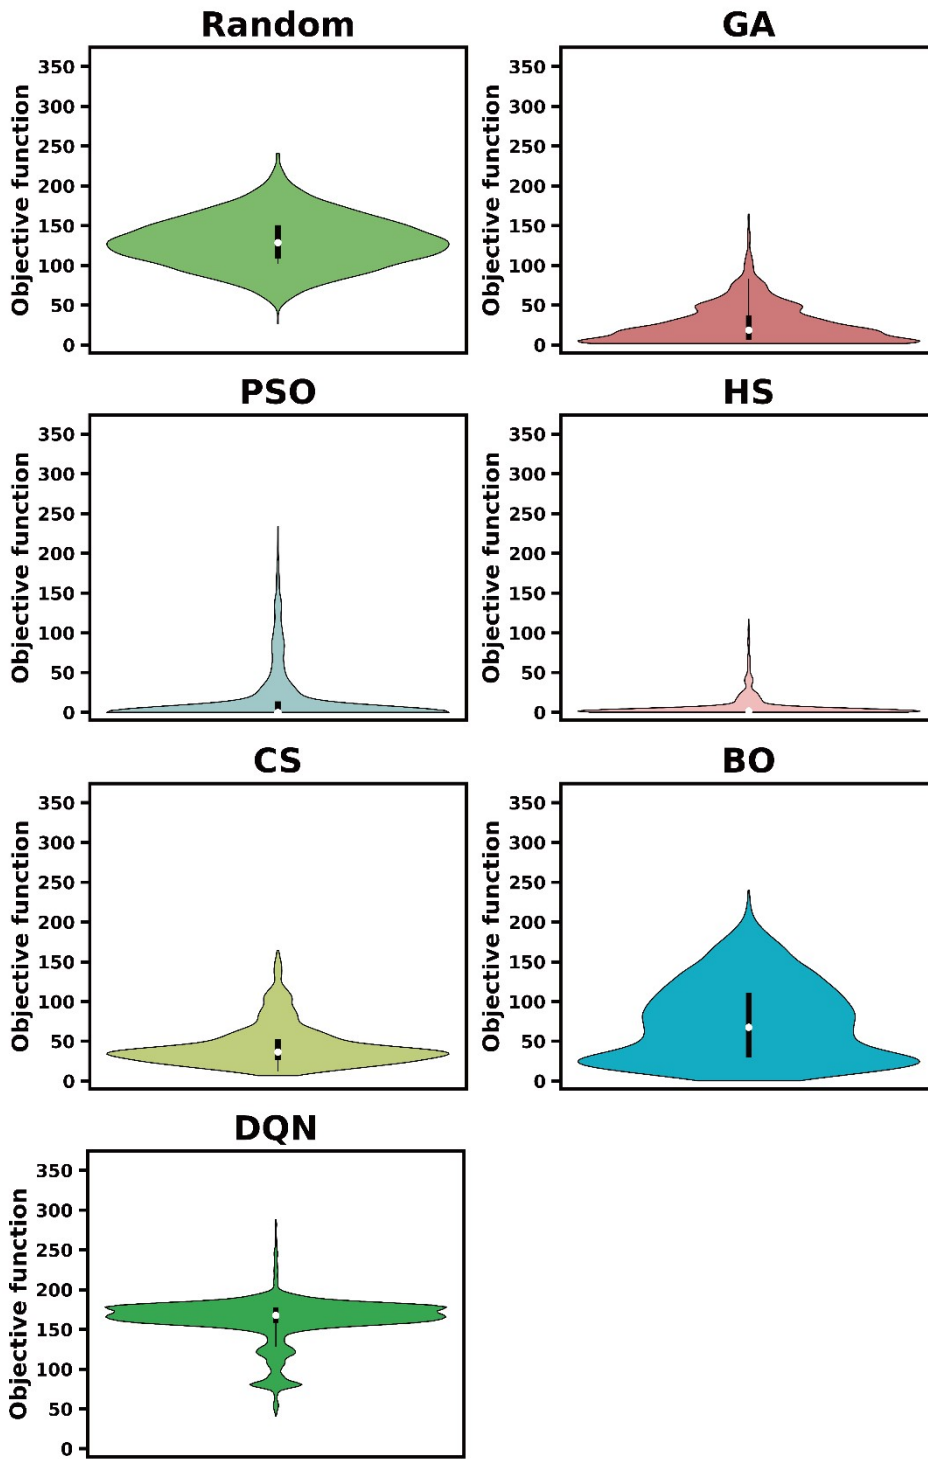

# Griewank

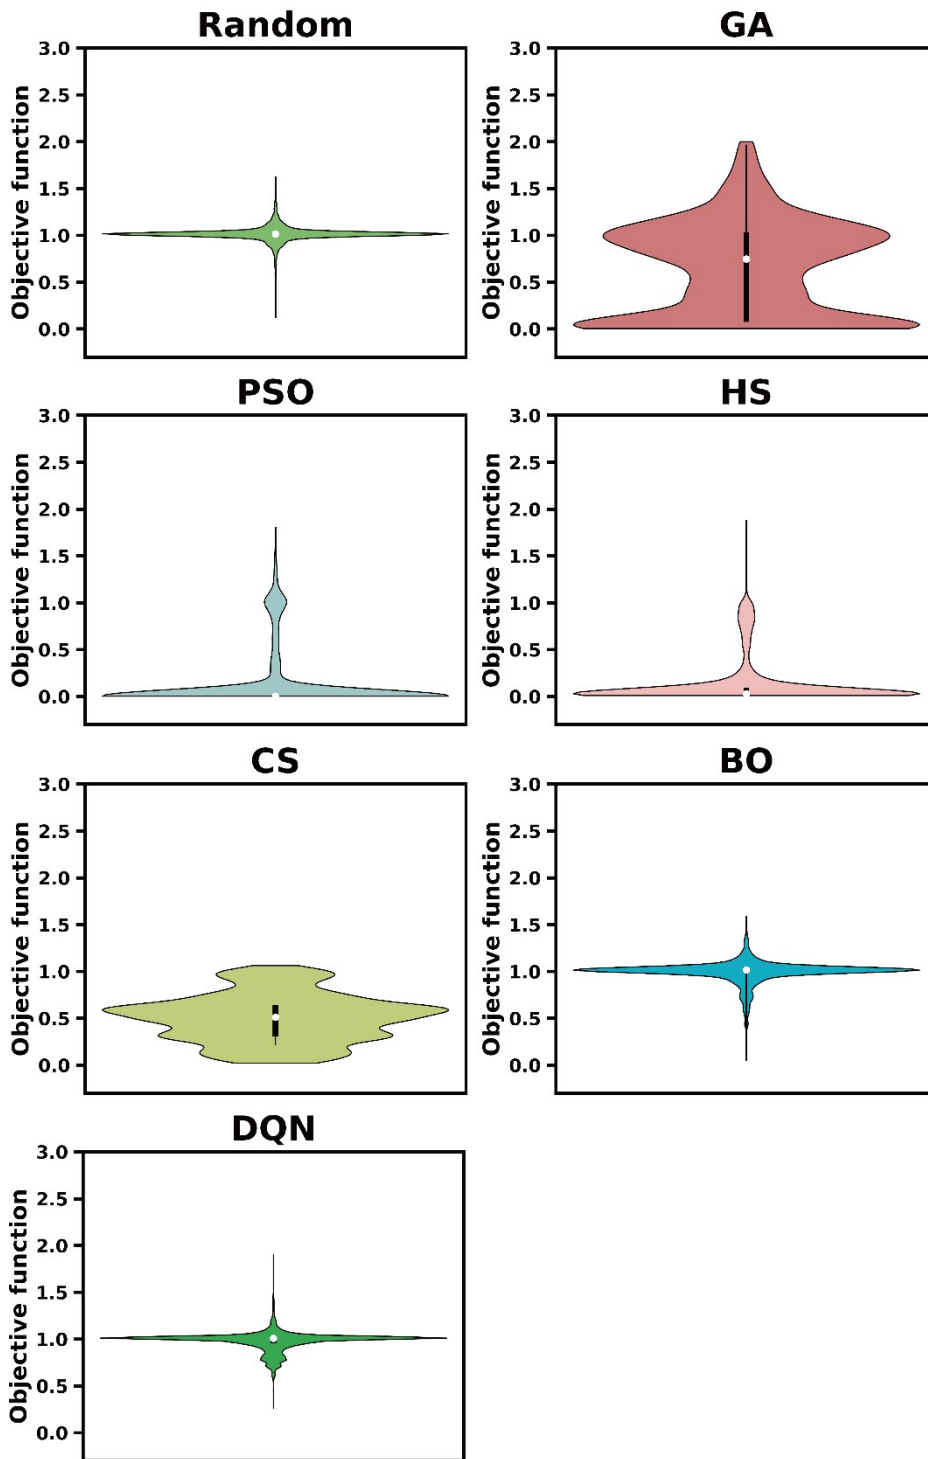



# Rastrigin

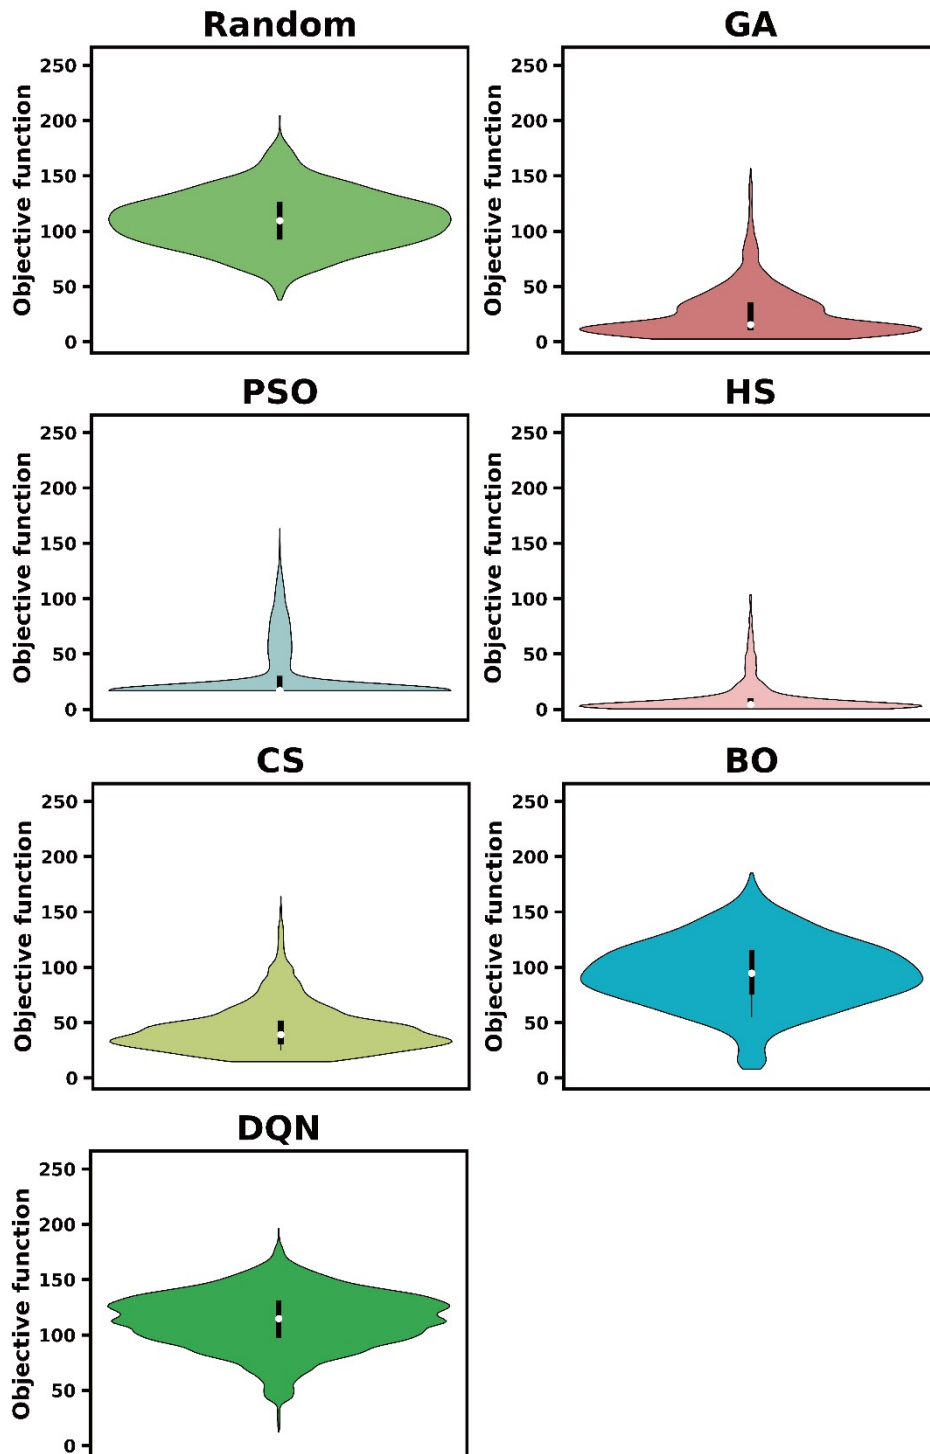

# Rosenbrock

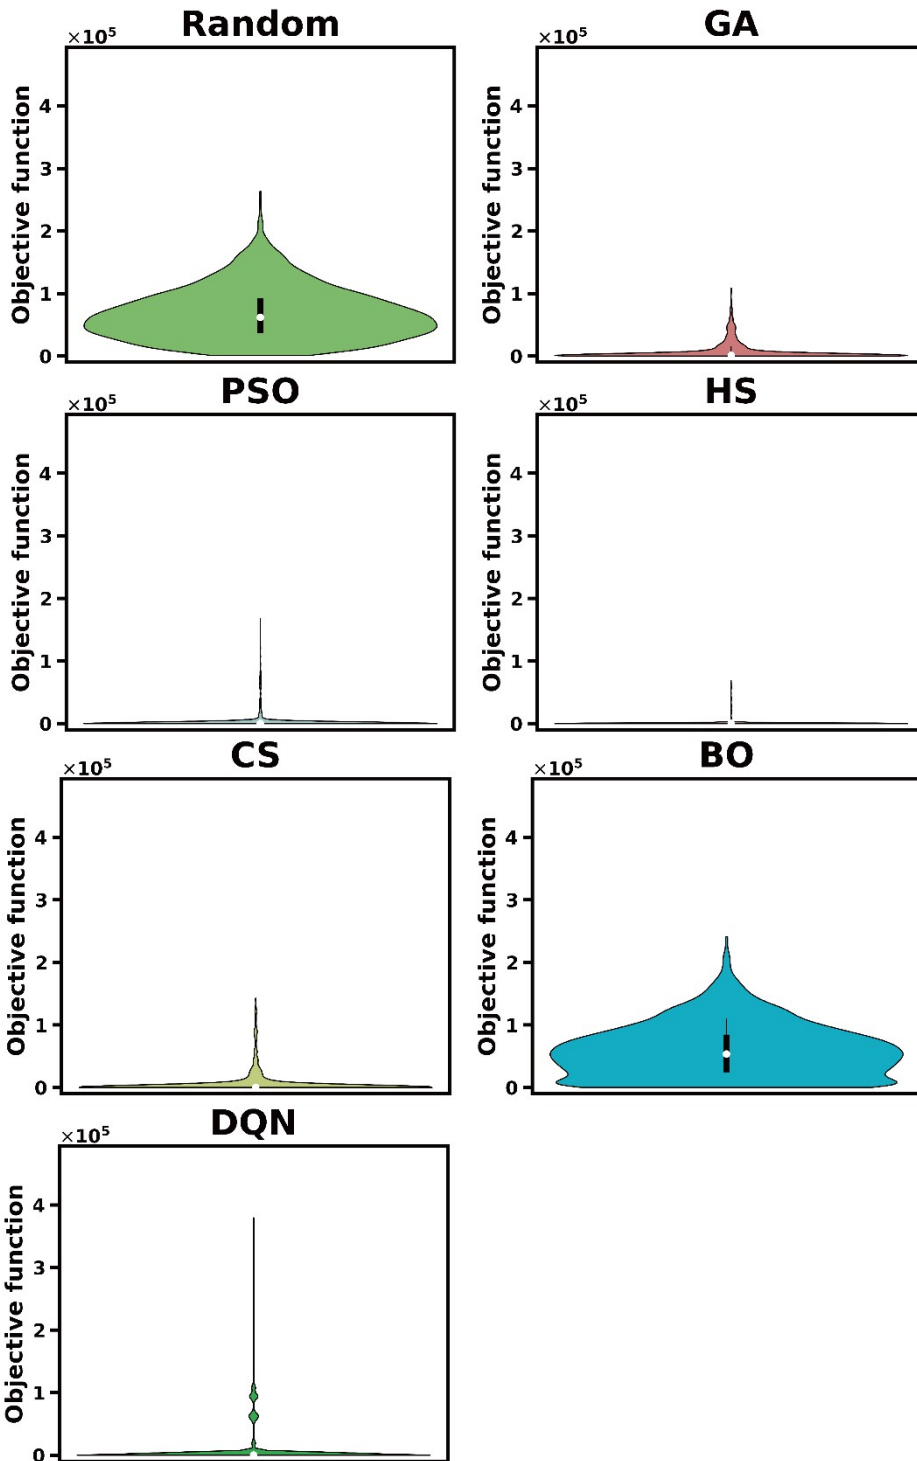

# Sphere

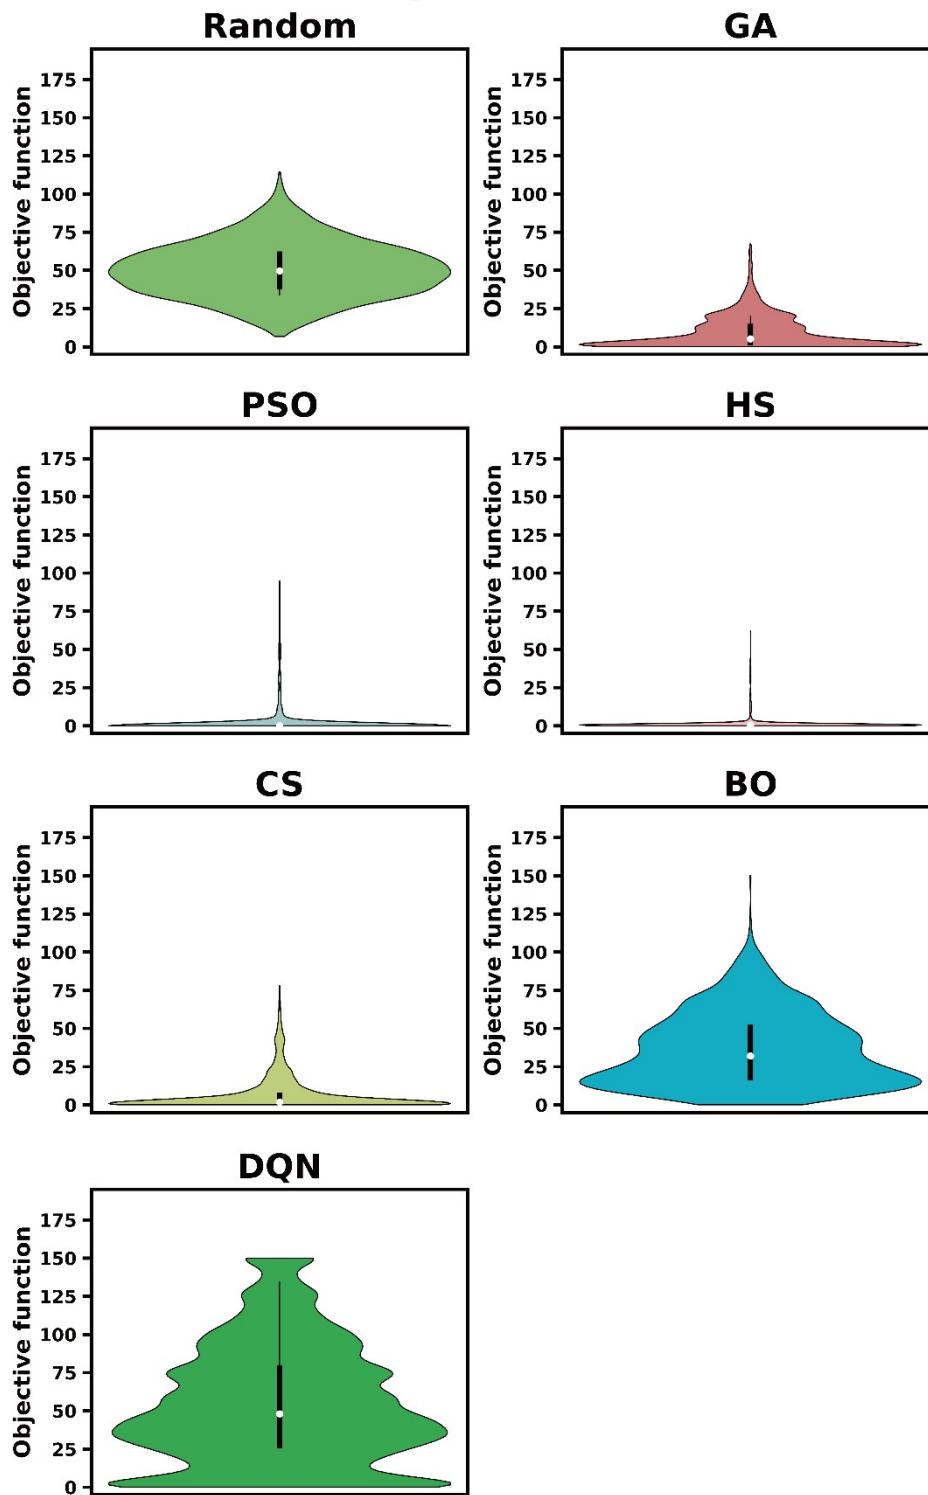

Fig. S3 Violin plots for every benchmark function data

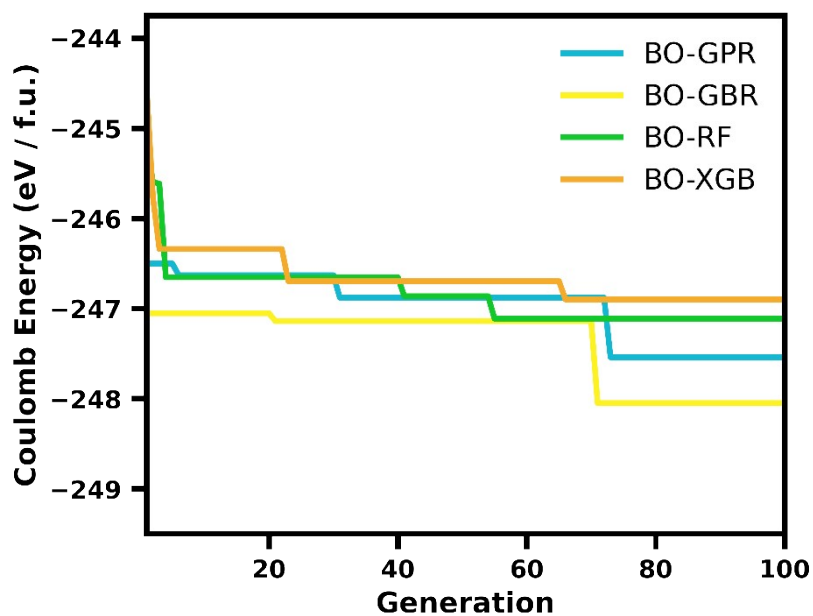

**Fig. S4** The instantaneous Coulomb energy value versus generation for BO with four different surrogate functions. GPR, GBR, RF and XGB are referred to as the gaussian process regression, gradient boost regression, random forest and extreme gradient(XG) boost regression, respectively.

**Table S1** Finally optimized objective function (benchmark function) values that was reached by each of the metaheuristics (GA, PSO, HS and CS), BO and DQN algorithms

| <b>Method</b> | <b>Ackley</b> | <b>Egg Crate</b>       | <b>Griewank</b>        | <b>Rastrigin</b> | <b>Rosenbrock</b> | <b>Sphere</b>           |
|---------------|---------------|------------------------|------------------------|------------------|-------------------|-------------------------|
| <b>Random</b> | 5.134         | 26.708                 | 0.124                  | 37.574           | 973.423           | 6.472                   |
| <b>GA</b>     | 0.346         | 1.341                  | 0.013                  | 5.606            | 66.077            | 0.168                   |
| <b>PSO</b>    | 0.003         | 0.628x10 <sup>-9</sup> | 0.246x10 <sup>-2</sup> | 7.583            | 3.821             | 0.390x10 <sup>-11</sup> |
| <b>HS</b>     | 0.138         | 0.193                  | 0.631                  | 1.099            | 1.957             | 0.001                   |
| <b>CS</b>     | 0.953         | 14.253                 | 0.102                  | 11.577           | 6.954             | 0.003                   |
| <b>BO</b>     | 0.853         | 9.566                  | 0.343                  | 27.283           | 35.055            | 0.002                   |
| <b>DQN</b>    | 2.072         | 57.792                 | 0.265                  | 16.82            | 0.185             | 0.051                   |

**Table S2** Hyperparameter for benchmark function

| <b>Method</b> | <b>Hyperparameter</b>                                                |
|---------------|----------------------------------------------------------------------|
| <b>Random</b> | -                                                                    |
| <b>GA</b>     | Mutation probability : 0.1 , elite size : 0.01 crossover probability |
| <b>PSO</b>    | $C_1 : 1, C_2 : 2, w : 0.5$                                          |
| <b>HS</b>     | HMCR : 0.7 PAR : 0.3 bw : 0.01                                       |
| <b>CS</b>     | $P_a : 0.25 \beta : 1.5$                                             |
| <b>BO</b>     | $\alpha : 10^{-5} \cdot \beta : 10^{-7}$                             |
| <b>DQN</b>    | Episode length : 2500, Learning rate : 0.001                         |
